# Supplementary material for: Ordered structure of the transcription network inherited from the yeast whole-genome duplication
Source: Springer Nature journal article supplement (doi:10.1186/1752-0509-4-77), 2010-06-03
Supplement: 12918_2010_466_MOESM3_ESM.pdf [file 12918_2010_466_MOESM3_ESM.pdf]

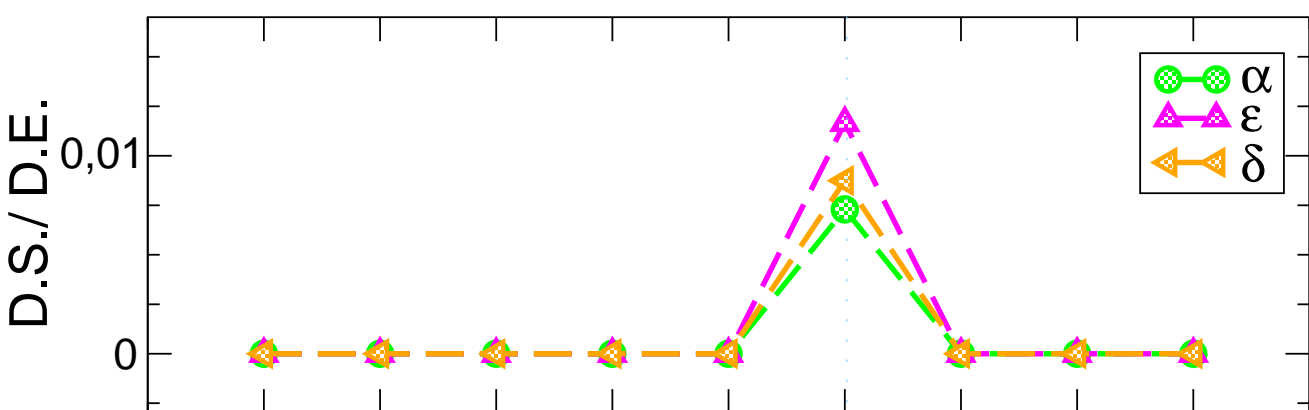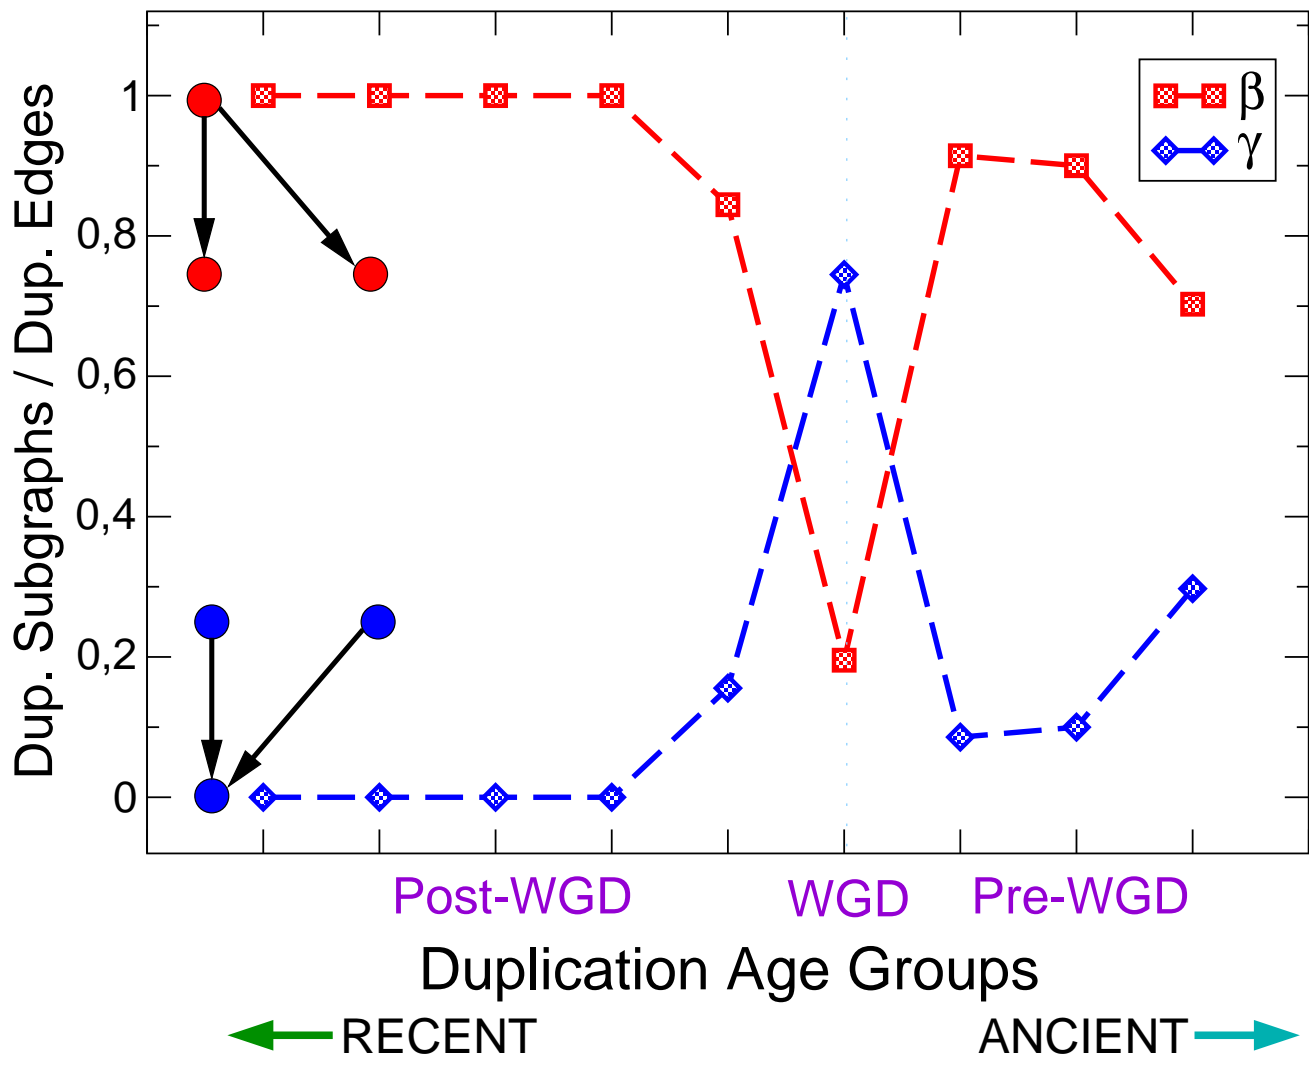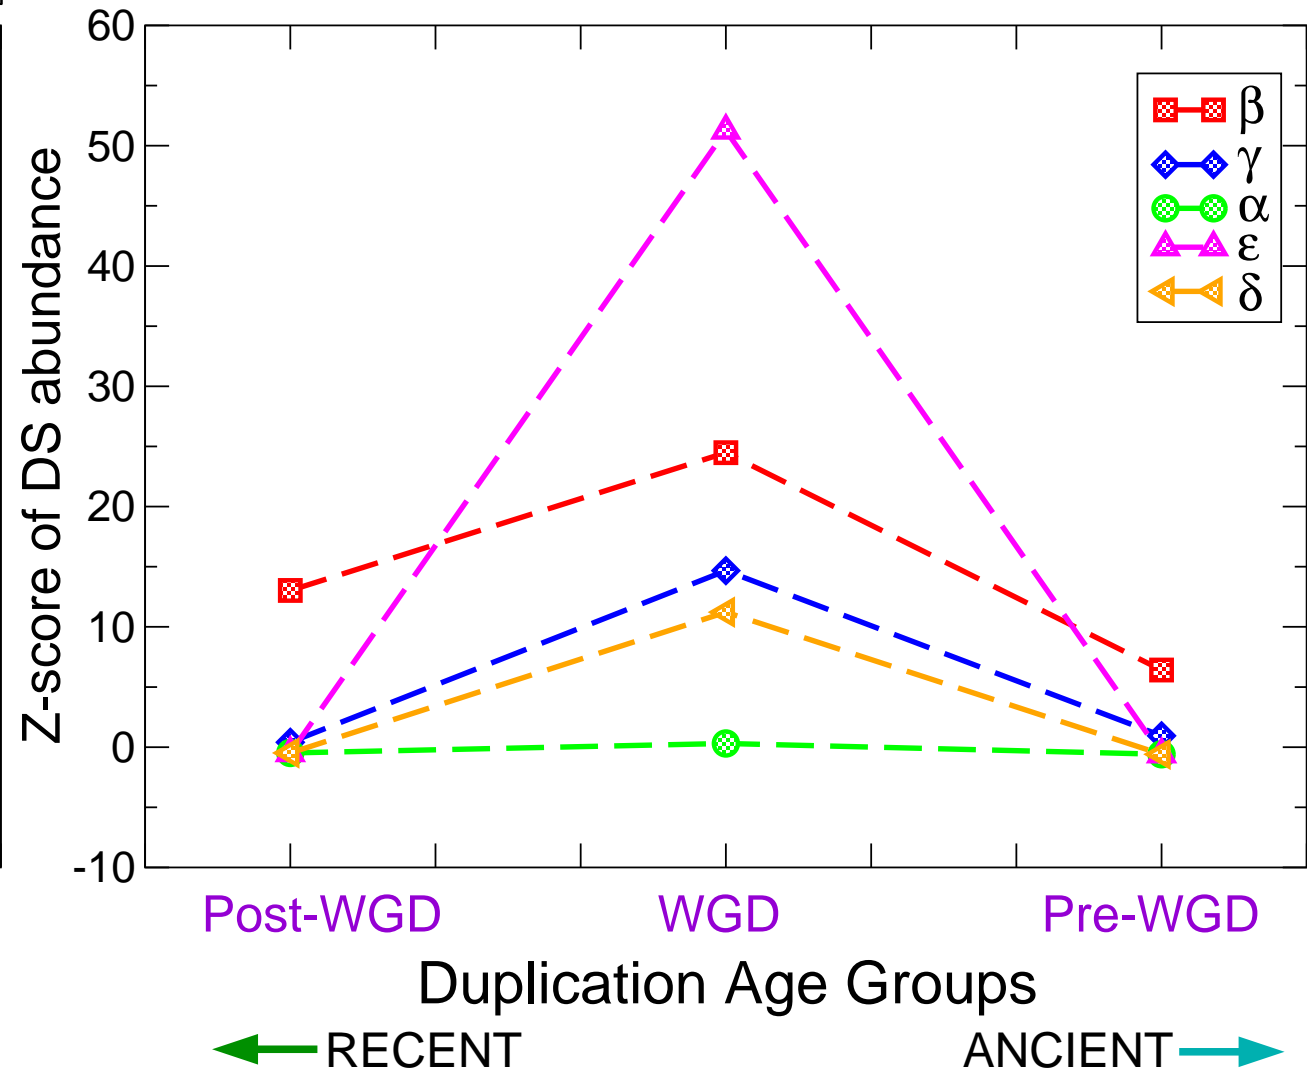

## Duplication Subgraphs Legend

| Color / Label | Example |
|---------------|---------|
|---------------|---------|

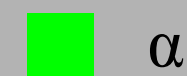

$\alpha$

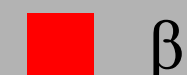

$\beta$

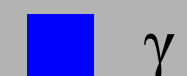

$\gamma$

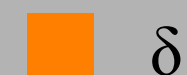

$\delta$

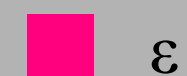

$\epsilon$

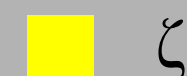

$\zeta$

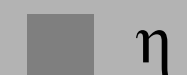

$\eta$

| Example |
|---------|
|         |
|         |
|         |
|         |
|         |
|         |
|         |
|         |
