# Supplementary material for: Ordered structure of the transcription network inherited from the yeast whole-genome duplication
Source: Springer Nature journal article supplement (doi:10.1186/1752-0509-4-77), 2010-06-03

# One-shot WGD model

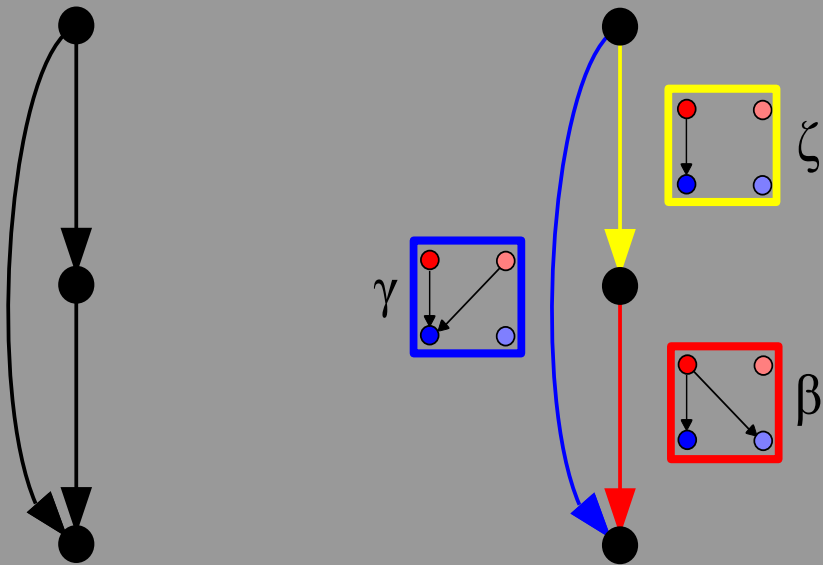

Ancestral (collapsed) Network

Random "coloring" by Duplication Subgraphs

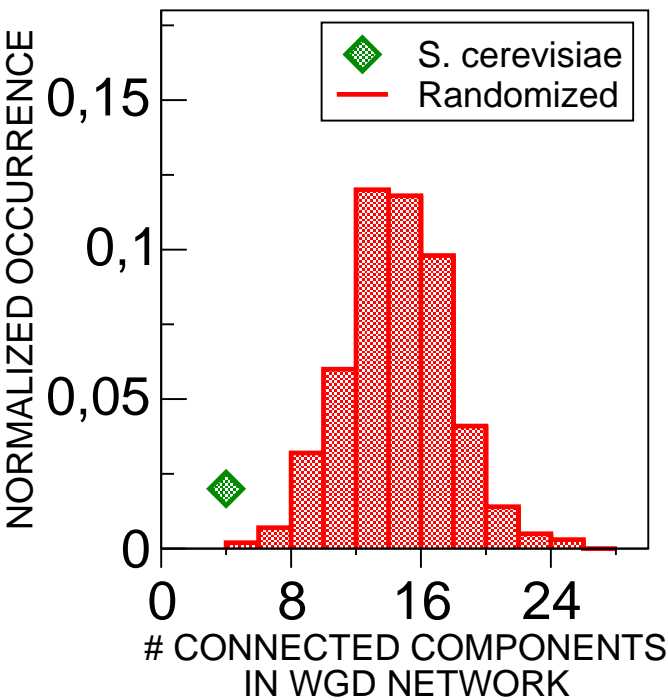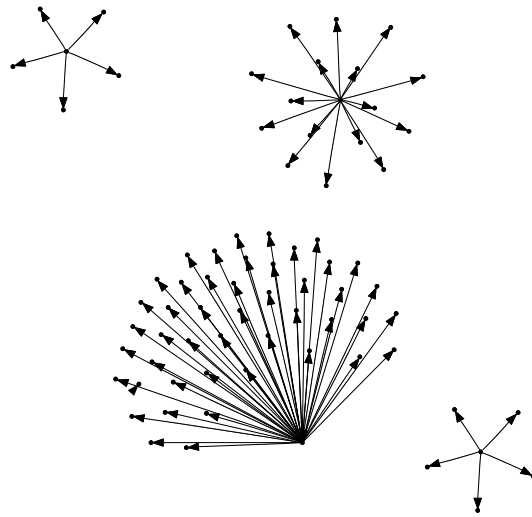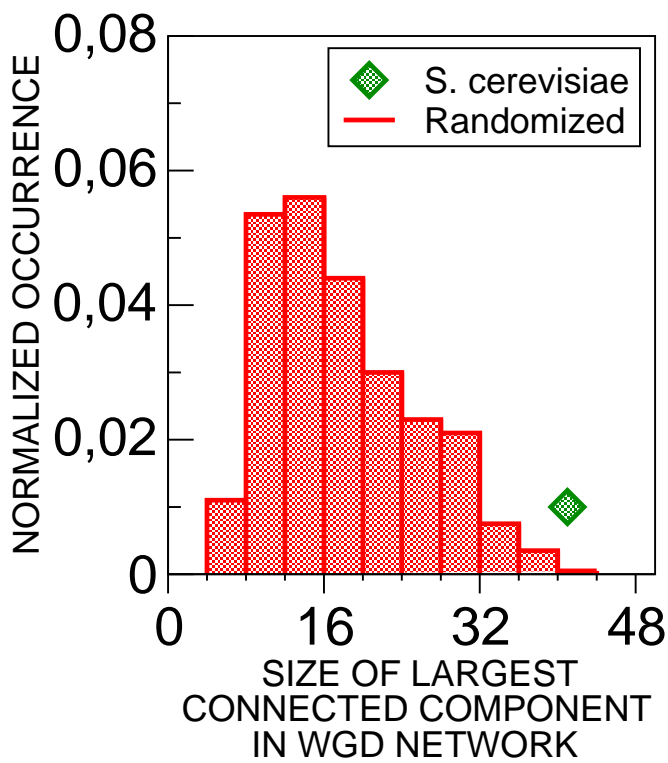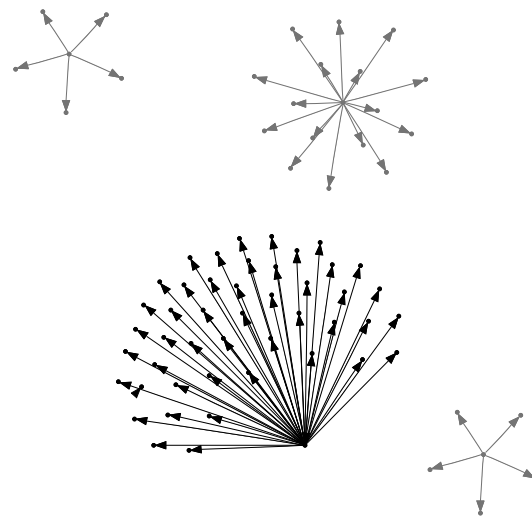

Supplement: 12918_2010_466_MOESM4_ESM.pdf [file 12918_2010_466_MOESM4_ESM.pdf]
