# Supplementary material for: Ordered structure of the transcription network inherited from the yeast whole-genome duplication
Source: Springer Nature journal article supplement (doi:10.1186/1752-0509-4-77), 2010-06-03
Supplement: 12918_2010_466_MOESM5_ESM.pdf [file 12918_2010_466_MOESM5_ESM.pdf]

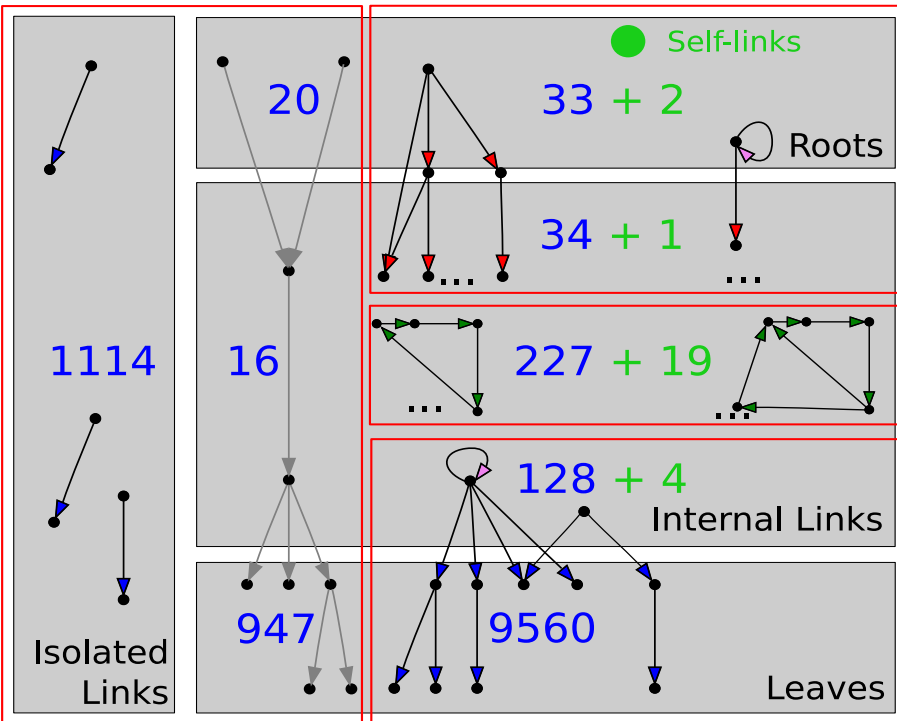

Tree-like region

Upstream

Core

Downstream

|                      | UPSTREAM         | DOWNSTREAM   | CORE            |
|----------------------|------------------|--------------|-----------------|
| DUPLICATION SUBGRAPH | Z-SCORE          | Z-SCORE      | Z-SCORE         |
| ● $\alpha$           | -0.17            | -0.5         | <b>6.23</b>     |
| ● $\beta$            | <b>4.97</b>      | -0.41        | <b>2.85</b>     |
| ● $\gamma$           | -1.72            | <b>3.39</b>  | <b>2.45</b>     |
| ● $\delta$           | -0.18            | 0.09         | <b>2.65</b>     |
| ● $\epsilon$         | -0.21            | -0.55        | <b>2.20</b>     |
| ● $\zeta$            | -0.71            | <b>-2.70</b> | <b>-4.53</b>    |
|                      | TREE-LIKE REGION | SELF-LINKS   | UPSTREAM + CORE |
| DUPLICATION SUBGRAPH | Z-SCORE          | Z-SCORE      | Z-SCORE         |
| ● $\alpha$           | -0.93            | -0.10        | <b>5.39</b>     |
| ● $\beta$            | -0.88            | -0.54        | <b>4.87</b>     |
| ● $\gamma$           | <b>-7.88</b>     | 0.88         | 1.33            |
| ● $\delta$           | -1.02            | -0.11        | <b>2.24</b>     |
| ● $\epsilon$         | -1.18            | <b>15.13</b> | 1.83            |
| ● $\zeta$            | <b>7.68</b>      | <b>-2.22</b> | <b>-4.32</b>    |
