# Supplementary material for: Ordered structure of the transcription network inherited from the yeast whole-genome duplication
Source: Springer Nature journal article supplement (doi:10.1186/1752-0509-4-77), 2010-06-03
Supplement: 12918_2010_466_MOESM6_ESM.pdf [file 12918_2010_466_MOESM6_ESM.pdf]

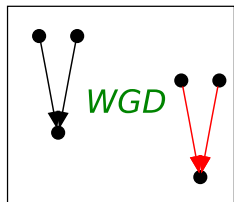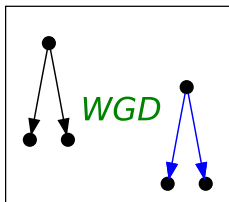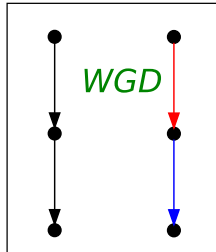

ADJACENT  
INCOMING

ADJACENT  
OUTGOING

CONSECUTIVE

PAIR

Z-SCORE

Z-SCORE

PAIR

Z-SCORE

$\zeta \longleftrightarrow \zeta$

0.68

**25.81**

$\zeta \longleftrightarrow \beta$

-4.19

-0.45

$\zeta \longleftrightarrow \gamma$

0.68

**-56.19**

$\beta \longleftrightarrow \beta$

**25.64**

**44.53**

$\beta \longleftrightarrow \gamma$

-1.49

**-25.27**

$\gamma \longleftrightarrow \gamma$

-1.32

**157.1**

$\zeta \longrightarrow \zeta$

2.49

$\zeta \longrightarrow \beta$

**-36.48**

$\zeta \longrightarrow \gamma$

-7.32

$\beta \longrightarrow \zeta$

**34.25**

$\beta \longrightarrow \beta$

-8.83

$\beta \longrightarrow \gamma$

**33.81**

$\gamma \longrightarrow \zeta$

0.47

$\gamma \longrightarrow \beta$

**-10.51**

$\gamma \longrightarrow \gamma$

3.09
